# Supplementary material
Source: PubMed Central journal article supplement (PMC9056059)
Supplement: NIHMS1798213-supplement-Supplemental_Appendix.pdf [file NIHMS1798213-supplement-Supplemental_Appendix.pdf]

## APPENDIX

### Appendix Exhibit A1. State Locations of Billing NPIs using Office Ally Claims Data

| State | Count of billing NPIs<br>(n=39,214) | Percent |
|-------|-------------------------------------|---------|
| AK    | 128                                 | 0.3%    |
| AL    | 212                                 | 0.5%    |
| AR    | 115                                 | 0.3%    |
| AZ    | 620                                 | 1.6%    |
| CA    | 11461                               | 29.2%   |
| CO    | 589                                 | 1.5%    |
| CT    | 611                                 | 1.6%    |
| DC    | 86                                  | 0.2%    |
| DE    | 103                                 | 0.3%    |
| FL    | 1375                                | 3.5%    |
| GA    | 604                                 | 1.5%    |
| HI    | 265                                 | 0.7%    |
| IA    | 139                                 | 0.4%    |
| ID    | 249                                 | 0.6%    |
| IL    | 1585                                | 4.0%    |
| IN    | 326                                 | 0.8%    |
| KS    | 190                                 | 0.5%    |
| KY    | 197                                 | 0.5%    |
| LA    | 169                                 | 0.4%    |
| MA    | 1631                                | 4.2%    |
| MD    | 531                                 | 1.4%    |
| ME    | 289                                 | 0.7%    |
| MI    | 480                                 | 1.2%    |
| MN    | 359                                 | 0.9%    |
| MO    | 370                                 | 0.9%    |
| MS    | 78                                  | 0.2%    |
| MT    | 116                                 | 0.3%    |
| NC    | 775                                 | 2.0%    |
| ND    | 25                                  | 0.1%    |
| NE    | 171                                 | 0.4%    |
| NH    | 336                                 | 0.9%    |
| NJ    | 1125                                | 2.9%    |
| NM    | 293                                 | 0.7%    |
| NV    | 319                                 | 0.8%    |
| NY    | 2652                                | 6.8%    |
| OH    | 554                                 | 1.4%    |
| OK    | 244                                 | 0.6%    |

|    |      |      |
|----|------|------|
| OR | 2102 | 5.4% |
| PA | 744  | 1.9% |
| RI | 225  | 0.6% |
| SC | 167  | 0.4% |
| SD | 62   | 0.2% |
| TN | 399  | 1.0% |
| TX | 1398 | 3.6% |
| UT | 341  | 0.9% |
| VA | 584  | 1.5% |
| VT | 319  | 0.8% |
| WA | 3091 | 7.9% |
| WI | 278  | 0.7% |
| WV | 83   | 0.2% |
| WY | 49   | 0.1% |

Appendix Exhibit A2. Characteristics of Mental Health Encounters (Full Table)

|                                                      | 2016                  | 2017                  | 2018                  | 2020                  |
|------------------------------------------------------|-----------------------|-----------------------|-----------------------|-----------------------|
| <b>Unique encounters, no.</b>                        | 23,367,181            | 25,803,093            | 27,224,568            | 25,274,298            |
| <b>Age*</b>                                          |                       |                       |                       |                       |
| 12-17                                                | 2,523,801<br>(10.8%)  | 2,841,697<br>(11.0%)  | 3,036,246 (11.2%)     | 2,599,883<br>(10.3%)  |
| 18-24                                                | 2,476,237<br>(10.6%)  | 2,847,409<br>(11.0%)  | 3,118,719 (11.5%)     | 3,090,588<br>(12.2%)  |
| 25-34                                                | 4,493,261<br>(19.2%)  | 5,098,660<br>(19.8%)  | 5,427,399 (19.9%)     | 5,340,945<br>(21.1%)  |
| 35-44                                                | 4,491,196<br>(19.2%)  | 4,914,048<br>(19.0%)  | 5,133,182 (18.9%)     | 4,880,199<br>(19.3%)  |
| 45-54                                                | 4,193,469<br>(17.9%)  | 4,464,877<br>(17.3%)  | 4,528,230 (16.6%)     | 3,873,029<br>(15.3%)  |
| 55-64                                                | 3,157,290<br>(13.5%)  | 3,415,132<br>(13.2%)  | 3,565,894 (13.1%)     | 3,153,367<br>(12.5%)  |
| 65+                                                  | 2,031,927<br>(8.7%)   | 2,221,270 (8.6%)      | 2,414,898 (8.9%)      | 2,336,287 (9.2%)      |
| <b>Female gender</b>                                 | 15,447,150<br>(66.1%) | 17,130,351<br>(66.4%) | 18,051,477<br>(66.3%) | 17,063,856<br>(67.5%) |
| <b>Mental health conditions*</b>                     |                       |                       |                       |                       |
| Trauma- and stressor-related disorders               | 7,111,356<br>(30.4%)  | 8,030,748<br>(31.1%)  | 8,566,193 (31.5%)     | 7,950,004<br>(31.5%)  |
| Depressive disorders                                 | 7,738,441<br>(33.1%)  | 8,256,971<br>(32.0%)  | 8,456,373 (31.1%)     | 7,483,185<br>(29.6%)  |
| Anxiety and fear-related disorders                   | 5,212,178<br>(22.3%)  | 5,993,218<br>(23.2%)  | 6,574,709 (24.1%)     | 6,645,798<br>(26.3%)  |
| Bipolar and other mood disorders                     | 1,588,558<br>(6.8%)   | 1,684,477 (6.5%)      | 1,701,084 (6.2%)      | 1,481,916 (5.9%)      |
| Schizophrenia spectrum and other psychotic disorders | 588,350 (2.5%)        | 639,738 (2.5%)        | 676,609 (2.5%)        | 580,791 (2.3%)        |
| Other                                                | 1,128,298<br>(4.8%)   | 1,197,941 (4.6%)      | 1,249,600 (4.6%)      | 1,132,604 (4.5%)      |
| <b>Encounter setting*</b>                            |                       |                       |                       |                       |
| Telehealth                                           | 470 (0.0%)            | 30,799 (0.1%)         | 80,824 (0.3%)         | 10,017,789<br>(39.6%) |
| <b>Provider type</b>                                 |                       |                       |                       |                       |
| Non-Prescriber Specialty MH                          | 17,038,988<br>(72.9%) | 18,706,231<br>(72.5%) | 19,704,013<br>(72.4%) | 17,867,083<br>(70.7%) |
| MH Prescriber (Psychiatrist, NP/PA)                  | 2,543,731<br>(10.9%)  | 2,713,908<br>(10.5%)  | 2,775,491 (10.2%)     | 2,836,658<br>(11.2%)  |
| Other Provider/Unspecified                           | 3,212,403<br>(13.7%)  | 3,444,745<br>(13.4%)  | 3,571,497<br>(13.1%)  | 3,564,302<br>(14.1%)  |

Appendix Exhibit A3. Changes in Pre- and During-Pandemic Mental Health Utilization, by Population and Condition Group (Full Table)

|                                             | 2016-2018                |             | 2020                     |             |                       |                       |             |                        |              |
|---------------------------------------------|--------------------------|-------------|--------------------------|-------------|-----------------------|-----------------------|-------------|------------------------|--------------|
|                                             | Mo. Average Total Visits | % of Visits | Mo. Average Total Visits | % of Visits | % Change from 2016-18 | Mo. Average In person | % In Person | Mo. Average Telehealth | % Telehealth |
| Unique encounters, no.                      | 2,122,079                |             | 2,106,192                |             | -0.7%                 | 1,271,376             | 60.4%       | 834,816                | 39.6%        |
| <b>Age*</b>                                 |                          |             |                          |             |                       |                       |             |                        |              |
| 12-17                                       | 233,382                  | 11.0%       | 216,657                  | 10.3%       | -7.2%                 | 131,974               | 10.4%       | 84,683                 | 10.1%        |
| 18-24                                       | 234,510                  | 11.1%       | 257,549                  | 12.2%       | 9.8%                  | 146,675               | 11.5%       | 110,874                | 13.3%        |
| 25-34                                       | 417,203                  | 19.7%       | 445,079                  | 21.1%       | 6.7%                  | 248,022               | 19.5%       | 197,057                | 23.6%        |
| 35-44                                       | 403,845                  | 19.0%       | 406,683                  | 19.3%       | 0.7%                  | 237,731               | 18.7%       | 168,953                | 20.2%        |
| 45-54                                       | 366,294                  | 17.3%       | 322,752                  | 15.3%       | -11.9%                | 198,058               | 15.6%       | 124,695                | 14.9%        |
| 55-64                                       | 281,620                  | 13.3%       | 262,781                  | 12.5%       | -6.7%                 | 166,166               | 13.1%       | 96,614                 | 11.6%        |
| 65+                                         | 185,225                  | 8.7%        | 194,691                  | 9.2%        | 5.1%                  | 142,751               | 11.2%       | 51,940                 | 6.2%         |
| <b>Sex*</b>                                 |                          |             |                          |             |                       |                       |             |                        |              |
| Female                                      | 1,406,361                | 66.3%       | 1,421,988                | 67.5%       | 1.1%                  | 840,471               | 66.1%       | 581,517                | 69.7%        |
| <b>Mental Health Condition*</b>             |                          |             |                          |             |                       |                       |             |                        |              |
| Trauma- and stressor-related disorders      | 658,564                  | 31.0%       | 662,500                  | 31.5%       | 0.6%                  | 395,652               | 31.1%       | 266,848                | 32.0%        |
| Depressive disorders                        | 679,216                  | 32.0%       | 623,599                  | 29.6%       | -8.2%                 | 386,165               | 30.4%       | 237,434                | 28.4%        |
| Anxiety and fear-related disorders          | 493,892                  | 23.3%       | 553,817                  | 26.3%       | 12.1%                 | 323,912               | 25.5%       | 229,905                | 27.5%        |
| Bipolar and other mood related disorders    | 138,170                  | 6.5%        | 123,493                  | 5.9%        | -10.6%                | 75,716                | 9.0%        | 47,777                 | 5.7%         |
| Schizophrenia and other psychotic disorders | 52,908                   | 2.5%        | 48,399                   | 2.3%        | -8.5%                 | 34,350                | 2.7%        | 14,049                 | 1.7%         |
| Other                                       | 99,329                   | 4.7%        | 94,384                   | 4.5%        | -5.0%                 | 55,581                | 4.4%        | 38,803                 | 4.6%         |
| <b>Provider Type*</b>                       |                          |             |                          |             |                       |                       |             |                        |              |
| Other Specialty MH                          | 1,540,256                | 72.6%       | 1,488,924                | 70.7%       | -3.3%                 | 871,447               | 68.5%       | 617,477                | 74.0%        |
| MH Prescriber (Psychiatrist, NP/PA)         | 223,143                  | 10.5%       | 236,388                  | 11.2%       | 5.9%                  | 151,594               | 11.9%       | 84,795                 | 10.2%        |
| Other Provider                              | 358,680                  | 16.9%       | 380,880                  | 18.1%       | 6.2%                  | 199,839               | 15.7%       | 120,404                | 14.4%        |
